# Supplementary material
Source: PubMed Central journal article supplement (PMC2954751)
Supplement: blood-2008-02-141689_1.pdf [file blood-2008-02-141689_1.pdf]

| Variable                                               | First chronic phase |               | Advanced phase |               |
|--------------------------------------------------------|---------------------|---------------|----------------|---------------|
|                                                        | N eval              | N (%)         | N eval         | N (%)         |
| <b>Supplemental form</b>                               |                     |               |                |               |
| Best imatinib response prior to transplant             | 176                 |               | 216            |               |
| None                                                   |                     | 18 (10)       |                | 34 (16)       |
| Hematological                                          |                     | 61 (35)       |                | 84 (39)       |
| Cytogenetic >35% Ph+ metaphases                        |                     | 45 (26)       |                | 46 (21)       |
| Cytogenetic <35% Ph+ metaphases                        |                     | 36 (20)       |                | 39 (18)       |
| Molecular                                              |                     | 16 ( 9)       |                | 13 ( 6)       |
| Imatinib maximum dose (mg/day), median (range)         | 167                 | 400 (150-800) | 200            | 600 (200-999) |
| Imatinib maximum dose (mg/day):categories              | 185                 |               | 224            |               |
| 0-399                                                  |                     | 88 (48)       |                | 43 (19)       |
| 400-600                                                |                     | 50 (27)       |                | 95 (42)       |
| >600                                                   |                     | 29 (15)       |                | 62 (28)       |
| Unknown                                                |                     | 18 (10)       |                | 24 (11)       |
| Duration of imatinib therapy, median months (range)    | 174                 | 9 (0.2-55)    | 213            | 8 (1-60)      |
| Interval from last dose imatinib to transplant, months | 185                 |               | 224            |               |
| 0-½                                                    |                     | 94 (51)       |                | 117 (52)      |
| ½-1                                                    |                     | 21 (11)       |                | 17 ( 8)       |
| 1-3                                                    |                     | 25 (13)       |                | 37 (16)       |
| 3-6                                                    |                     | 16 ( 9)       |                | 31 (14)       |
| 6-12                                                   |                     | 10 ( 5)       |                | 6 ( 3)        |
| >12                                                    |                     | 3 ( 2)        |                | 3 ( 1)        |
| unknown                                                |                     | 16 ( 9)       |                | 13 ( 6)       |
| Reasons to proceed to HCT                              | 180                 |               | 222            |               |
| Planned transplant                                     |                     | 97 (54)       |                | 95 (43)       |
| Intolerance to imatinib                                |                     | 17 ( 9)       |                | 13 ( 6)       |
| Imatinib therapy failure or no response                |                     | 66 (37)       |                | 114 (51)      |
| If imatinib therapy failure or no response             | 66                  |               | 114            |               |
| Unsatisfactory/no response                             |                     | 30 (45)       |                | 11 (10)       |
| Hematologic progression                                |                     | 9 (14)        |                | 71 (62)       |
| Cytogenetic progression                                |                     | 21 (32)       |                | 17 (15)       |
| Molecular progression                                  |                     | 2 ( 3)        |                | 2 ( 2)        |
| Unspecified                                            |                     | 4 ( 6)        |                | 13 (11)       |

**Abbreviations:** CIBMTR = Center for International Blood and Marrow Transplant Research; Ph+ = Philadelphia chromosome positive; HCT = hematopoietic cell transplantation
