# Supplementary material
Source: PubMed Central journal article supplement (PMC2954751)
Supplement: blood-2008-02-141689_2.pdf [file blood-2008-02-141689_2.pdf]

| <b>Variables:</b>                     | <b>Relative Risk<br/>of death<br/>(95% CI)</b> | <b>P-value</b>       | <b>Relative Risk<br/>of TRM<br/>(95% CI)</b> | <b>P-value</b>       |
|---------------------------------------|------------------------------------------------|----------------------|----------------------------------------------|----------------------|
| Patient age, yrs                      |                                                | 0.0087 <sup>d</sup>  |                                              | 0.04 <sup>d</sup>    |
| 31-40 vs. ≤ 30                        | 1.21 (0.88-1.65)                               | 0.25                 | 1.17 (0.83-1.63)                             | 0.37                 |
| 41-50 vs. ≤ 30                        | 1.21 (0.88-1.67)                               | 0.24                 | 1.16 (0.83-1.63)                             | 0.38                 |
| > 50 vs. ≤ 30                         | 1.79 (1.28-2.51)                               | 0.0008               | 1.72 (1.18-2.49)                             | 0.0044               |
| Patient sex                           |                                                |                      |                                              |                      |
| Male vs. Female                       | 0.90 (0.72-1.14)                               | 0.40 <sup>b</sup>    | 1.00 (0.78-1.28)                             | 0.99 <sup>b</sup>    |
| Patient race                          |                                                |                      |                                              |                      |
| Non-white vs. White                   | 1.07 (0.82-1.41)                               | 0.60 <sup>b</sup>    | 1.11 (0.83-1.48)                             | 0.48 <sup>b</sup>    |
| Karnofsky performance status          |                                                | 0.35 <sup>c</sup>    |                                              | 0.24 <sup>c</sup>    |
| > 80 vs. ≤ 80                         | 0.78 (0.54-1.11)                               | 0.17                 | 0.76 (0.52-1.12)                             | 0.16                 |
| Unknown vs. ≤ 80                      | 0.90 (0.48-1.71)                               | 0.76                 | 1.04 (0.54-1.99)                             | 0.92                 |
| Time from diagnosis to HCT, mos       |                                                |                      |                                              |                      |
| > 12 vs. ≤ 12                         | 1.52 (1.21-1.92)                               | 0.0004 <sup>b</sup>  | 1.64 (1.28-2.11)                             | <0.0001 <sup>b</sup> |
| Donor type                            |                                                |                      |                                              |                      |
| Unrelated vs. Matched Sibling         | 1.66 (1.30-2.13)                               | <0.0001 <sup>b</sup> | 1.81 (1.38-2.37)                             | <0.0001 <sup>b</sup> |
| Sex match, Donor/Recipient            |                                                | 0.072 <sup>d</sup>   |                                              | 0.21 <sup>d</sup>    |
| Male/Female vs. Male/Male             | 1.15 (0.85-1.57)                               | 0.37                 | 1.24 (0.89-1.73)                             | 0.20                 |
| Female/Male vs. Male/Male             | 1.37 (1.02-1.85)                               | 0.039                | 1.35 (0.97-1.88)                             | 0.075                |
| Female/Female vs. Male/Male           | 0.89 (0.63-1.25)                               | 0.49                 | 0.99 (0.69-1.42)                             | 0.94                 |
| CMV status, Donor/Recipient           |                                                | 0.088 <sup>e</sup>   |                                              | 0.04 <sup>e</sup>    |
| +/- vs. +/+                           | 1.38 (0.94-2.04)                               | 0.10                 | 1.55 (1.03-2.35)                             | 0.037                |
| -/+ vs. +/+                           | 1.43 (1.03-1.98)                               | 0.033                | 1.57 (1.10-2.23)                             | 0.012                |
| -/- vs. +/+                           | 1.05 (0.77-1.43)                               | 0.75                 | 1.10 (0.78-1.53)                             | 0.60                 |
| Unknown vs. +/+                       | 0.89 (0.54-1.45)                               | 0.63                 | 1.00 (0.59-1.68)                             | 0.99                 |
| HLA match grade                       |                                                | <0.0001 <sup>e</sup> |                                              | <0.0001 <sup>e</sup> |
| Well matched vs. Matched sibling      | 1.32 (0.97-1.79)                               | 0.078                | 1.35 (0.96-1.90)                             | 0.080                |
| Partially matched vs. Matched sibling | 1.76 (1.28-2.41)                               | 0.0005               | 1.91 (1.36-2.67)                             | 0.0002               |
| Mismatched vs. Matched sibling        | 2.53 (1.77-3.60)                               | <0.0001              | 2.86 (1.97-4.15)                             | <0.0001              |
| Unknown vs. Matched sibling           | 1.69 (0.96-2.97)                               | 0.068                | 1.91 (1.04-3.51)                             | 0.038                |

|                                                |                  |                    |                  |                   |
|------------------------------------------------|------------------|--------------------|------------------|-------------------|
| Conditioning regimen                           |                  |                    |                  |                   |
| Non-myeloablative vs. myeloablative            | 1.03 (0.73-1.44) | 0.87 <sup>b</sup>  | 0.96 (0.65-1.44) | 0.85 <sup>b</sup> |
| Graft source                                   |                  |                    |                  |                   |
| Peripheral blood vs. bone marrow               | 1.12 (0.87-1.42) | 0.38 <sup>b</sup>  | 1.03 (0.79-1.34) | 0.84 <sup>b</sup> |
| Year of transplant                             |                  |                    |                  |                   |
| 2001-2002 vs. 1999-2000                        | 0.84 (0.63-1.11) | 0.22               | 0.83 (0.61-1.13) | 0.22              |
| 2003-2004 vs. 1999-2000                        | 0.82 (0.59-1.13) | 0.21               | 0.83 (0.59-1.17) | 0.28              |
| GVHD prophylaxis regimen                       |                  |                    |                  |                   |
| Tacrolimus + Methotrexate +/- Others vs. TCD   | 0.72 (0.44-1.16) | 0.17               | 0.65 (0.39-1.08) | 0.095             |
| Tacrolimus +/- Others vs. TCD                  | 1.08 (0.51-2.31) | 0.84               | 0.97 (0.40-2.37) | 0.94              |
| Cyclosporine + Methotrexate +/- Others vs. TCD | 0.64 (0.42-0.96) | 0.033              | 0.57 (0.37-0.88) | 0.010             |
| Cyclosporine +/- Others vs. TCD                | 0.75 (0.45-1.25) | 0.27               | 0.67 (0.39-1.18) | 0.17              |
| Imatinib before HCT                            |                  |                    |                  |                   |
| Imatinib vs. No Imatinib                       | 1.32 (0.97-1.79) | 0.079 <sup>b</sup> | 1.31 (0.94-1.82) | 0.12 <sup>b</sup> |

Abbreviations: TRM = treatment-related mortality; CI = confidence interval; TCD = T cell depletion; HCT = hematopoietic cell transplantation

<sup>a</sup> Reference group

<sup>b</sup> One degree of freedom

<sup>c</sup> Two degrees of freedom

<sup>d</sup> Three degrees of freedom

<sup>e</sup> Four degrees of freedom
