# Supplementary material
Source: PubMed Central journal article supplement (PMC2954751)
Supplement: blood-2008-02-141689_3.pdf [file blood-2008-02-141689_3.pdf]

|                                                        | Intolerant/<br>Toxicity | IM failure/no<br>response | Planned HCT | p-value<br>(IM<br>failure/no<br>response<br>vs.<br>planned<br>HCT) |
|--------------------------------------------------------|-------------------------|---------------------------|-------------|--------------------------------------------------------------------|
| N (%)                                                  | 17                      | 66                        | 97          |                                                                    |
| Age at HCT, n (%)                                      |                         |                           |             | 0.01                                                               |
| <=30                                                   | 4 (23)                  | 15 (23)                   | 42 (43)     |                                                                    |
| 31-40                                                  | 3 (18)                  | 14 (21)                   | 24 (25)     |                                                                    |
| 41-50                                                  | 3 (18)                  | 26 (39)                   | 20 (21)     |                                                                    |
| >50                                                    | 7 (41)                  | 11 (17)                   | 11 (11)     |                                                                    |
| Male, n (%)                                            | 9 (53)                  | 32 (48)                   | 58 (60)     | 0.15                                                               |
| White race, n (%)                                      | 11 (65)                 | 53 (80)                   | 83 (86)     | 0.37                                                               |
| Karnofsky at HCT, n (%)                                |                         |                           |             | 0.50                                                               |
| <=80%                                                  | 0                       | 6 ( 9)                    | 6 ( 6)      |                                                                    |
| >80%                                                   | 16 (94)                 | 52 (79)                   | 78 (81)     |                                                                    |
| Missing                                                | 1 ( 6)                  | 8 (12)                    | 13 (13)     |                                                                    |
| Donor, n (%)                                           |                         |                           |             | 0.13                                                               |
| HLA sibling                                            | 6 (35)                  | 23 (35)                   | 20 (21)     |                                                                    |
| Other relative                                         | 0                       | 1 ( 2)                    | 2 ( 2)      |                                                                    |
| Unrelated                                              | 11 (65)                 | 42 (64)                   | 75 (77)     |                                                                    |
| Conditioning regimen, n (%)                            |                         |                           |             | 0.02                                                               |
| Myeloablative                                          | 12 (71)                 | 46 (70)                   | 82 (85)     |                                                                    |
| Reduced intensity                                      | 5 (29)                  | 20 (30)                   | 15 (15)     |                                                                    |
| Graft type, n (%)                                      |                         |                           |             | 0.01                                                               |
| Bone marrow                                            | 9 (53)                  | 28 (42)                   | 60 (62)     |                                                                    |
| Peripheral blood                                       | 8 (47)                  | 38 (58)                   | 37 (38)     |                                                                    |
| Year of transplantation, n (%)                         |                         |                           |             | 0.09                                                               |
| 1999-2000                                              | 0                       | 0                         | 1 ( 1)      |                                                                    |
| 2001-2002                                              | 6 (35)                  | 12 (18)                   | 31 (32)     |                                                                    |
| 2003-2004                                              | 11 (65)                 | 54 (82)                   | 65 (67)     |                                                                    |
| Median follow-up of survivors, mos,<br>median (range)  | 30 (22-56)              | 33 (8-60)                 | 31 (12-65)  |                                                                    |
| Interval from diagnosis to HCT, mos,<br>median (range) | 15 (5-40)               | 15 (4-57)                 | 11 (2-106)  | <0.001                                                             |
| Duration of IM treatment, mos,<br>median (range)       | 7 (1-36)                | 14 (0.6-47)               | 8 (0.16-55) | <0.001                                                             |

|                                       |              |               |              |        |
|---------------------------------------|--------------|---------------|--------------|--------|
| Best IM response, n (%)               |              |               |              | <0.001 |
| None                                  | 3 (18)       | 8 (12)        | 7 ( 7)       |        |
| Molecular                             | 1 ( 6)       | 2 ( 3)        | 13 (13)      |        |
| Cytogenetic <35%                      | 2 (12)       | 8 (12)        | 26 (27)      |        |
| Cytogenetic >35%                      | 4 (23)       | 27 (41)       | 14 (15)      |        |
| Hematological                         | 5 (29)       | 19 (29)       | 36 (37)      |        |
| Missing                               | 2 (12)       | 2 ( 3)        | 1 ( 1)       |        |
| Other drugs used to treat CML, n (%)  |              |               |              | 0.39   |
| None                                  | 0            | 0             | 3 ( 3)       |        |
| Busulfan                              | 0            | 1 ( 2)        | 0            |        |
| Hydroxyurea                           | 14 (82)      | 47 (71)       | 69 (71)      |        |
| Interferon alpha                      | 0            | 1 ( 2)        | 2 ( 2)       |        |
| Interferon gamma                      | 0            | 0             | 1 ( 1)       |        |
| Anagrelide                            | 0            | 3 ( 5)        | 1 ( 1)       |        |
| Others                                | 3 (18)       | 13 (20)       | 20 (21)      |        |
| Hemoglobin: g/dL                      | 13 (9-15)    | 12 (9-17)     | 12 (8-15)    | 0.005  |
| Platelets: 10 <sup>9</sup> /L         | 232 (60-544) | 222 (52-1568) | 208 (88-593) | 0.68   |
| White blood count: 10 <sup>9</sup> /L | 6 (2-57)     | 5 (1-141)     | 6 (3-72)     | 0.95   |
| Blasts: %                             | 0 (0-8)      | 0 (0-4)       | 0 (0-3)      | 0.19   |
| EBMT score                            |              |               |              | 0.01   |
| 0-1                                   | 1 ( 6)       | 4 ( 6)        | 12 (12)      |        |
| 2                                     | 6 (35)       | 14 (21)       | 34 (35)      |        |
| 3                                     | 3 (18)       | 25 (38)       | 36 (38)      |        |
| 4                                     | 6 (35)       | 22 (33)       | 12 (12)      |        |
| 5+                                    | 1 ( 6)       | 1 ( 2)        | 3 ( 3)       |        |
| <b>Outcomes</b>                       |              |               |              |        |
| TRM at 1 yr                           | 12 (1-31)    | 17 (9-27)     | 21 (13-30)   | 0.50   |
| TRM at 3 yr                           | 12 (1-31)    | 23 (14-34)    | 26 (18-36)   | 0.63   |
| Relapse at 1 yr                       | 18 (4-39)    | 27 (17-39)    | 8 (4-15)     | 0.002  |
| Relapse at 3 yr                       | 24 (7-46)    | 32 (21-45)    | 11 (5-18)    | 0.002  |
| LFS at 1 yr                           | 71 (47-89)   | 56 (44-67)    | 71 (61-79)   | 0.05   |
| LFS at 3 yr                           | 65 (41-85)   | 45 (0-100)    | 63 (52-72)   | 0.78   |
| OS at 1 yr                            | 82 (61-96)   | 79 (68-88)    | 79 (71-87)   | 0.90   |
| OS at 3 yr                            | 82 (61-96)   | 69 (57-79)    | 73 (63-81)   | 0.58   |

**Abbreviations:** IM = imatinib mesylate; HCT = hematopoietic cell transplantation; HLA = human leukocyte antigen;

CML = chronic myeloid leukemia; EBMT = European Blood and Marrow Transplantation; TRM = treatment-related mortality; LFS = leukemia-free survival; OS = overall survival.
